# Supplementary material for: Pectinesterase activity and gene expression correlate with pathogenesis of Phytophthora infestans
Source: PubMed Central journal article supplement (PMC11588465; doi:10.3389/fpls.2024.1481165), 2024-11-12
Supplement: DataSheet1.pdf [file DataSheet1.pdf]

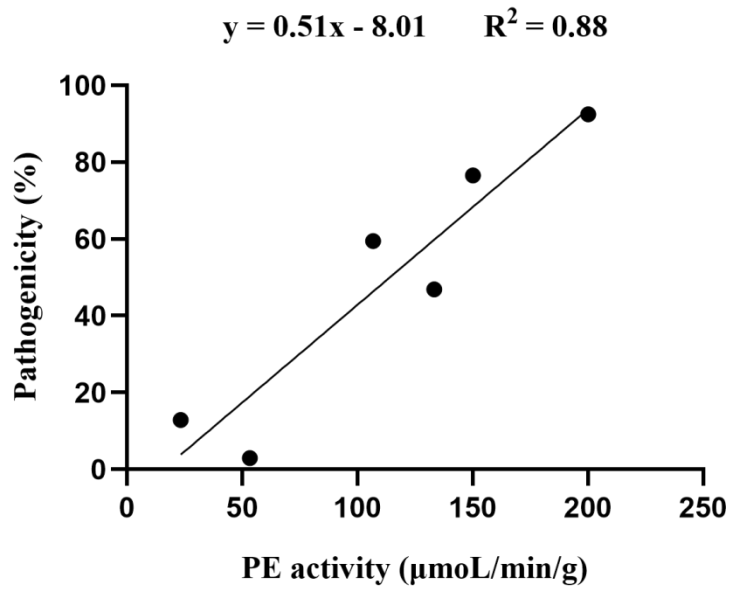

**Figure S1.** The correlation between PE activity and pathogenicity of *Phytophthora infestans*.
