# Supplementary material for: Pectinesterase activity and gene expression correlate with pathogenesis of Phytophthora infestans
Source: PubMed Central journal article supplement (PMC11588465; doi:10.3389/fpls.2024.1481165), 2024-11-12
Supplement: DataSheet2.pdf [file DataSheet2.pdf]

$$y = 0.01X + 10.20 \quad R^2 = 0.42$$

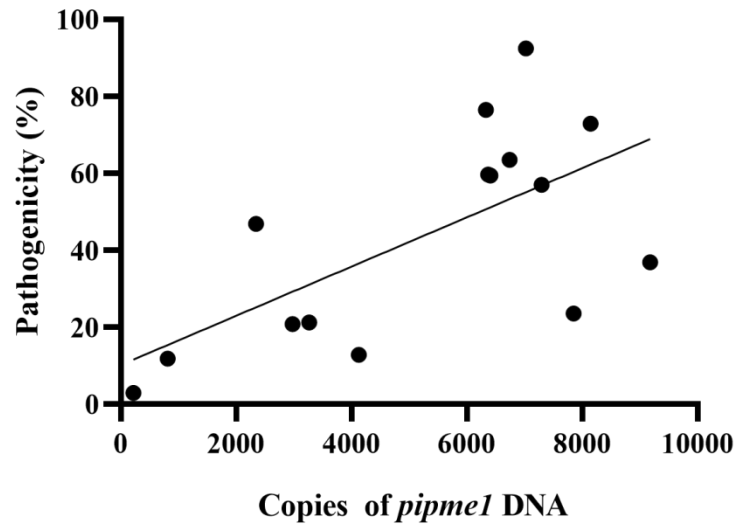

Figure S2. The correlation between Copies of *pipme1* DNA and pathogenicity of *Phytophthora infestans*.
